# Supplementary material for: Impact of Common Variants of PPARG, KCNJ11, TCF7L2, SLC30A8, HHEX, CDKN2A, IGF2BP2, and CDKAL1 on the Risk of Type 2 Diabetes in 5,164 Indians
Source: PubMed Central journal article supplement — Diabetes. 2010 Apr 27;59(8):2068–74. doi: 10.2337/db09-1386 (PMC2911051; doi:10.2337/db09-1386), 2010-04-27
Supplement: supp_db09-1386_onlineappendix.pdf [file supp_db09-1386_onlineappendix.pdf]

**Supplementary Table 1: Association of SNPs with type 2 diabetes in Delhi and Pune studies before and after adjustments for covariates**

| SNP (Gene)           | Delhi            |                  |                       |                  |                       | Pune             |                  |                       |                  |                       | Combined         |                  |                       |                  |                       |
|----------------------|------------------|------------------|-----------------------|------------------|-----------------------|------------------|------------------|-----------------------|------------------|-----------------------|------------------|------------------|-----------------------|------------------|-----------------------|
|                      | n Cases/Controls | OR* (95% CI)     | p*                    | OR† (95% CI)     | p†                    | n Cases/Controls | OR* (95% CI)     | p*                    | OR† (95% CI)     | p†                    | n Cases/Controls | OR* (95% CI)     | p*                    | OR‡ (95% CI)     | p‡                    |
| rs1801282 (PPARG)    | 1019/1004        | 1.29 (1.06-1.54) | 0.009                 | 1.30 (1.08-1.57) | 0.006                 | 1422/1553        | 1.43 (1.21-1.69) | $2.5 \times 10^{-5}$  | 1.47 (1.15-1.88) | $1.8 \times 10^{-3}$  | 2441/2557        | 1.35 (1.20-1.53) | $1.4 \times 10^{-6}$  | 1.37 (1.19-1.59) | $1.6 \times 10^{-5}$  |
| rs5219 (KCNJ11)      | 1017/1006        | 1.19 (1.05-1.36) | 0.009                 | 1.17 (1.02-1.33) | 0.02                  | 1417/1397        | 1.67 (1.49-1.86) | $6.4 \times 10^{-19}$ | 1.84 (1.55-2.18) | $4.4 \times 10^{-12}$ | 2434/2403        | 1.44 (1.33-1.57) | $1.8 \times 10^{-17}$ | 1.39 (1.26-1.54) | $6.7 \times 10^{-11}$ |
| rs7903146 (TCF7L2)   | 1017/1006        | 1.64 (1.44-1.88) | $2.1 \times 10^{-13}$ | 1.67 (1.46-1.92) | $1.7 \times 10^{-13}$ | 1423/1515        | 2.07 (1.85-2.33) | $4.6 \times 10^{-35}$ | 2.10 (1.77-2.49) | $1.7 \times 10^{-17}$ | 2439/2521        | 1.88 (1.72-2.05) | $4.2 \times 10^{-46}$ | 1.89 (1.71-2.09) | $4.6 \times 10^{-34}$ |
| rs13266634 (SLC30A8) | 1010/1000        | 1.29 (1.12-1.50) | 0.0006                | 1.32 (1.13-1.53) | 0.0003                | 1456/1539        | 1.23 (1.08-1.39) | $1.2 \times 10^{-3}$  | 1.25 (1.04-1.51) | 0.02                  | 2466/2539        | 1.25 (1.14-1.38) | $3.7 \times 10^{-6}$  | 1.34 (1.20-1.50) | $3.4 \times 10^{-7}$  |
| rs1111875 (HHEX)     | 1018/1003        | 1.23 (1.09-1.40) | 0.001                 | 1.29 (1.13-1.47) | 0.0001                | 1454/1598        | 1.15 (1.04-1.27) | $6.3 \times 10^{-3}$  | 1.20 (1.03-1.39) | 0.02                  | 2472/2601        | 1.18 (1.09-1.28) | $3.1 \times 10^{-5}$  | 1.27 (1.16-1.39) | $5.7 \times 10^{-7}$  |
| rs10811661 (CDKN2A)  | 1019/1006        | 1.28 (1.06-1.55) | 0.01                  | 1.30 (1.07-1.59) | 0.009                 | 1431/1086        | 1.38(1.16-1.63)  | $1.8 \times 10^{-4}$  | 1.43 (1.09-1.87) | 0.01                  | 2450/2092        | 1.33 (1.18-1.51) | $7.7 \times 10^{-6}$  | 1.37 (1.18-1.59) | $5.1 \times 10^{-5}$  |
| rs4402960 (IGF2BP2)  | 1019/1006        | 1.16 (1.02-1.31) | 0.02                  | 1.18 (1.03-1.33) | 0.02                  | 1444/868         | 1.18 (1.04-1.32) | $7.4 \times 10^{-3}$  | 1.30 (1.08-1.56) | $5.5 \times 10^{-3}$  | 2463/1874        | 1.19 (1.09-1.30) | $6.0 \times 10^{-5}$  | 1.20 (1.09-1.33) | $2.6 \times 10^{-3}$  |
| rs10946398 (CDKAL1)  | 1006/990         | 1.15 (1.00-1.32) | 0.04                  | 1.19 (1.03-1.38) | 0.02                  | 1456/1512        | 1.08 (0.96-1.21) | 0.20                  | 1.17 (0.98-1.38) | 0.08                  | 2462/2501        | 1.11 (1.01-1.21) | 0.03                  | 1.18 (1.07-1.32) | $1.6 \times 10^{-3}$  |

n represents the number of subjects genotyped; \* Odds ratio unadjusted for covariates; † Odds ratio adjusted for sex, age and BMI; ‡ Odds ratio adjusted for sex, age, BMI and geographical region (Delhi and Pune).

**Supplementary Table 2: Meta-analysis performed by combining the summary data of the two studies**

| Gene    | SNP        | P (F)                 | P (R)                | OR (F) | OR (R) | Q    | I     |
|---------|------------|-----------------------|----------------------|--------|--------|------|-------|
| PPARG   | rs1801282  | $4.3 \times 10^{-5}$  | $4.4 \times 10^{-5}$ | 1.36   | 1.36   | 0.44 | 0     |
| KCNJ11  | rs5219     | $1.7 \times 10^{-9}$  | 0.10                 | 1.38   | 1.46   | 0.00 | 94.04 |
| TCF7L2  | rs7903146  | $1.7 \times 10^{-28}$ | $4.2 \times 10^{-8}$ | 1.83   | 1.86   | 0.04 | 75.86 |
| SLC30A8 | rs13266634 | $2.0 \times 10^{-5}$  | $2.0 \times 10^{-5}$ | 1.29   | 1.29   | 0.65 | 0     |
| HHEX    | rs1111875  | $7.7 \times 10^{-6}$  | $7.7 \times 10^{-6}$ | 1.25   | 1.25   | 0.47 | 0     |
| CDKN2A  | rs10811661 | $2.8 \times 10^{-4}$  | $2.8 \times 10^{-4}$ | 1.34   | 1.34   | 0.60 | 0     |
| IGF2BP2 | rs4402960  | $4.2 \times 10^{-4}$  | $4.2 \times 10^{-4}$ | 1.21   | 1.21   | 0.36 | 0     |
| CDKAL1  | rs10946398 | $2.9 \times 10^{-3}$  | $2.9 \times 10^{-3}$ | 1.18   | 1.18   | 0.85 | 0     |

P (F): Fixed-effects meta-analysis p-value; P (R): Random-effects meta-analysis p-value; OR (F): Fixed-effects OR estimate; OR (R): Random-effects OR estimate; Q: p-value for Cochran's Q statistic; I: I<sup>2</sup> heterogeneity index (0-100)

**Supplementary Table 3: *A priori* and posterior power calculations for Delhi, Pune and combined studies**

| Gene           | SNP        | <i>a priori</i> Power        |                 |                 |                   |                 |                   |                 |                   | Posterior Power |                   |                 |                   |                 |                   |
|----------------|------------|------------------------------|-----------------|-----------------|-------------------|-----------------|-------------------|-----------------|-------------------|-----------------|-------------------|-----------------|-------------------|-----------------|-------------------|
|                |            | RAF in controls <sup>†</sup> | OR <sup>‡</sup> | Delhi           |                   | Pune            |                   | Combined        |                   | Delhi           |                   | Pune            |                   | Combined        |                   |
|                |            |                              |                 | $\alpha = 0.05$ | $\alpha = 0.0062$ |
| <i>PPARG</i>   | rs1801282  | 0.86                         | 1.14            | 30              | 10                | 42              | 16                | 62              | 32                | 79              | 52                | 99              | 98                | 99              | 99                |
| <i>KCNJ11</i>  | rs5219     | 0.47                         | 1.14            | 55              | 26                | 73              | 58                | 91              | 72                | 67              | 38                | 99              | 99                | 99              | 99                |
| <i>TCF7L2</i>  | rs7903146  | 0.26                         | 1.37            | 99              | 96                | 99              | 99                | 99              | 99                | 99              | 99                | 99              | 99                | 99              | 99                |
| <i>SLC30A8</i> | rs13266634 | 0.65                         | 1.12            | 40              | 15                | 56              | 26                | 77              | 49                | 96              | 83                | 94              | 79                | 99              | 99                |
| <i>HHEX</i>    | rs1111875  | 0.53                         | 1.13            | 49              | 21                | 67              | 37                | 87              | 64                | 98              | 91                | 95              | 80                | 99              | 99                |
| <i>CDKN2A</i>  | rs10811661 | 0.83                         | 1.20            | 57              | 27                | 75              | 46                | 92              | 74                | 76              | 48                | 99              | 97                | 99              | 99                |
| <i>IGF2BP2</i> | rs4402960  | 0.29                         | 1.14            | 48              | 20                | 66              | 36                | 86              | 62                | 74              | 46                | 99              | 99                | 99              | 97                |
| <i>CDKAL1</i>  | rs10946398 | 0.31                         | 1.12            | 39              | 15                | 55              | 26                | 76              | 48                | 64              | 34                | 79              | 51                | 95              | 82                |

Data are presented as percentages. Power calculations of the study were done assuming a log additive model with disease prevalence of 10%

<sup>†</sup> The risk allele frequencies for Europeans, DGI (9)

<sup>‡</sup> The ORs for Europeans, combined study of DGI, FUSION and WTCCC (9)

**Supplementary Table 4: HWE P-values and call rates of Delhi and Pune studies**

| Gene           | SNP        | Delhi                                  |                                       |               | Pune                               |                                       |                |
|----------------|------------|----------------------------------------|---------------------------------------|---------------|------------------------------------|---------------------------------------|----------------|
|                |            | HWE P-values in cases <sup>†</sup>     | HWE P-values in controls <sup>†</sup> | Call rate (%) | HWE P-values in cases <sup>†</sup> | HWE P-values in controls <sup>†</sup> | Call rates (%) |
| <i>PPARG</i>   | rs1801282  | 0.35                                   | 0.19                                  | 99            | 0.05                               | 0.64                                  | 95             |
| <i>KCNJ11</i>  | rs5219     | 0.05                                   | 0.84                                  | 99            | 0.91                               | 0.60                                  | 90             |
| <i>TCF7L2</i>  | rs7903146  | 0.43                                   | 0.59                                  | 99            | 0.003                              | 0.44                                  | 94             |
| <i>SLC30A8</i> | rs13266634 | 1.00                                   | 0.87                                  | 99            | 0.61                               | 1.00                                  | 95             |
| <i>HHEX</i>    | rs1111875  | 0.12                                   | 0.90                                  | 99            | 0.34                               | 0.96                                  | 97             |
| <i>CDKN2A</i>  | rs10811661 | 0.87                                   | 0.34                                  | 100           | 0.33                               | 0.21                                  | 80             |
| <i>IGF2BP2</i> | rs4402960  | 0.66                                   | 0.30                                  | 100           | 0.60                               | 0.19                                  | 74             |
| <i>CDKAL1</i>  | rs10946398 | <b><math>3.4 \times 10^{-8}</math></b> | 0.005                                 | 98            | 0.47                               | 0.89                                  | 95             |

HWE, Hardy-Weinberg equilibrium

<sup>†</sup> P-value of <0.0031 ( $\alpha = 0.05/16$ ) was considered significant

**Supplementary Table 5: Association of SNPs with quantitative traits (measures of obesity and lipid profile) in combined controls**

| Gene SNP                              | Genotypes Major Hetero Minor | n    | BMI (Kg/m <sup>2</sup> ) |                | WHR              |                | Total Cholesterol (mmol/l) |                | Triglyceride (mmol/l) |                | HDL-C (mmol/l)   |                |
|---------------------------------------|------------------------------|------|--------------------------|----------------|------------------|----------------|----------------------------|----------------|-----------------------|----------------|------------------|----------------|
|                                       |                              |      | Median (IQR)             | P <sup>†</sup> | Median (IQR)     | P <sup>†</sup> | Median (IQR)               | P <sup>‡</sup> | Median (IQR)          | P <sup>‡</sup> | Median (IQR)     | P <sup>‡</sup> |
| <i>PPARG</i><br>rs1801282<br>(C/G)    | CC                           | 1932 | 21.64 (18.91-24.95)      | 0.91           | 0.88 (0.79-0.95) | 0.71           | 3.97 (3.41-4.64)           | 0.32           | 1.01 (0.71-1.49)      | 0.75           | 0.85 (0.53-1.13) | 0.67           |
|                                       | CG                           | 578  | 21.40 (18.60-24.63)      |                | 0.88 (0.79-0.95) |                | 4.03 (3.41-4.69)           |                | 0.99 (0.71-1.47)      |                | 0.85 (0.51-1.10) |                |
|                                       | GG                           | 47   | 21.78 (19.51-25.16)      |                | 0.88 (0.83-0.97) |                | 3.78 (3.37-4.56)           |                | 1.13 (0.80-1.46)      |                | 0.70 (0.48-1.03) |                |
| <i>KCNJ11</i><br>rs5219<br>(C/T)      | CC                           | 1143 | 21.57 (18.76-24.45)      | 0.63           | 0.87 (0.79-0.94) | 0.01*          | 3.90 (3.38-4.57)           | 0.81           | 0.99 (0.71-1.45)      | 0.74           | 0.86 (0.54-1.13) | 0.35           |
|                                       | CT                           | 1016 | 21.53 (18.93-25.11)      |                | 0.89 (0.82-0.96) |                | 4.03 (3.46-4.67)           |                | 1.03 (0.74-1.52)      |                | 0.79 (0.50-1.08) |                |
|                                       | TT                           | 244  | 22.39 (19.22-25.39)      |                | 0.89 (0.81-0.97) |                | 4.10 (3.47-4.79)           |                | 1.08 (0.71-1.61)      |                | 0.70 (0.44-1.08) |                |
| <i>TCF7L2</i><br>rs7903146<br>(C/T)   | CC                           | 1449 | 21.45 (18.69-24.61)      | 0.74           | 0.87 (0.79-0.94) | 0.75           | 3.92 (3.41-4.60)           | 0.74           | 0.97 (0.70-1.45)      | 0.99           | 0.89 (0.56-1.13) | 0.90           |
|                                       | CT                           | 919  | 21.72 (19.03-25.23)      |                | 0.89 (0.81-0.95) |                | 4.00 (3.41-4.67)           |                | 1.04 (0.76-1.55)      |                | 0.77 (0.48-1.08) |                |
|                                       | TT                           | 153  | 21.74 (19.34-24.77)      |                | 0.88 (0.81-0.94) |                | 4.13 (3.41-4.74)           |                | 1.03 (0.74-1.51)      |                | 0.71 (0.47-1.04) |                |
| <i>SLC30A8</i><br>rs13266634<br>(C/T) | CC                           | 1487 | 21.54 (18.71-24.80)      | 0.62           | 0.88 (0.79-0.94) | 0.63           | 3.92 (3.38-4.61)           | 0.54           | 0.99 (0.71-1.49)      | 0.18           | 0.87 (0.54-1.13) | 0.54           |
|                                       | CT                           | 911  | 21.64 (19.00-25.22)      |                | 0.88 (0.80-0.95) |                | 4.04 (3.44-4.69)           |                | 1.03 (0.73-1.46)      |                | 0.82 (0.51-1.10) |                |
|                                       | TT                           | 141  | 22.20 (19.49-25.16)      |                | 0.89 (0.81-0.95) |                | 3.90 (3.38-4.63)           |                | 0.96 (0.69-1.47)      |                | 0.82 (0.50-1.10) |                |
| <i>HHEX</i><br>rs1111875<br>(A/G)     | AA                           | 847  | 21.72 (19.17-24.88)      | 0.37           | 0.88 (0.80-0.95) | 0.86           | 3.99 (3.42-4.67)           | 0.61           | 1.01 (0.72-1.48)      | 0.07           | 0.87 (0.54-1.13) | 0.05           |
|                                       | AG                           | 1274 | 21.59 (18.75-24.96)      |                | 0.88 (0.80-0.95) |                | 3.97 (3.41-4.62)           |                | 1.00 (0.72-1.45)      |                | 0.83 (0.52-1.13) |                |
|                                       | GG                           | 480  | 21.08 (18.88-24.69)      |                | 0.88 (0.80-0.94) |                | 3.95 (3.38-4.61)           |                | 0.99 (0.74-1.56)      |                | 0.82 (0.54-1.10) |                |
| <i>CDKN2A</i><br>rs10811661<br>(T/C)  | TT                           | 1554 | 21.31 (18.79-24.86)      | 0.61           | 0.89 (0.82-0.95) | 0.21           | 3.99 (3.44-4.65)           | 0.14           | 1.01 (0.73-1.49)      | 0.22           | 0.77 (0.48-1.08) | 0.06           |
|                                       | TC                           | 497  | 21.10 (18.60-25.08)      |                | 0.88 (0.81-0.95) |                | 3.95 (3.38-4.62)           |                | 1.01 (0.73-1.54)      |                | 0.78 (0.47-1.08) |                |
|                                       | CC                           | 41   | 19.95 (18.15-22.82)      |                | 0.88 (0.79-0.96) |                | 3.46 (3.10-4.05)           |                | 0.82 (0.58-1.26)      |                | 0.82 (0.58-1.03) |                |
| <i>IGF2BP2</i><br>rs4402960<br>(G/T)  | GG                           | 591  | 21.56 (18.79-25.63)      | 0.95           | 0.90 (0.83-0.97) | 0.10           | 4.03 (3.44-4.72)           | 0.96           | 1.11 (0.77-1.61)      | 0.53           | 0.68 (0.46-1.03) | 0.31           |
|                                       | GT                           | 919  | 21.68 (18.92-24.92)      |                | 0.89 (0.82-0.96) |                | 4.03 (3.44-4.67)           |                | 1.04 (0.74-1.54)      |                | 0.69 (0.45-1.06) |                |
|                                       | TT                           | 364  | 21.68 (18.92-24.92)      |                | 0.89 (0.81-0.95) |                | 3.95 (3.42-4.63)           |                | 1.03 (0.76-1.47)      |                | 0.77 (0.48-1.10) |                |
| <i>CDKAL1</i><br>rs10946398<br>(A/C)  | AA                           | 1466 | 21.63 (18.96-24.97)      | 0.68           | 0.88 (0.81-0.95) | 0.17           | 3.97 (3.41-4.66)           | 0.65           | 1.03 (0.73-1.50)      | 0.66           | 0.81 (0.51-1.08) | 0.66           |
|                                       | AC                           | 875  | 21.39 (18.94-24.61)      |                | 0.88 (0.79-0.95) |                | 3.97 (3.36-4.59)           |                | 0.97 (0.69-1.44)      |                | 0.90 (0.55-1.15) |                |
|                                       | CC                           | 160  | 20.94 (18.57-24.76)      |                | 0.87 (0.78-0.93) |                | 3.93 (3.43-4.59)           |                | 0.99 (0.74-1.53)      |                | 0.92 (0.58-1.15) |                |

n represents the number of individuals. Data are presented as median (Interquartile range).

<sup>†</sup> Analysis adjusted for sex, age and geographical region

<sup>‡</sup> Analysis adjusted for sex, age, BMI and geographical region

\* Significant P-value

**Supplementary Table 6: Association of SNPs with quantitative traits (measures of obesity and lipid profile) in Delhi study**

| Gene SNP                              | Genotypes Major Hetero Minor | n   | BMI (Kg/m <sup>2</sup> ) |                | WHR             |                | Total Cholesterol (mmol/l) |                | Triglyceride (mmol/l) |                | HDL-C (mmol/l)  |                |
|---------------------------------------|------------------------------|-----|--------------------------|----------------|-----------------|----------------|----------------------------|----------------|-----------------------|----------------|-----------------|----------------|
|                                       |                              |     | Median (IQR)             | P <sup>†</sup> | Median (IQR)    | P <sup>†</sup> | Median (IQR)               | P <sup>‡</sup> | Median (IQR)          | P <sup>‡</sup> | Median (IQR)    | P <sup>‡</sup> |
| <i>PPARG</i><br>rs1801282<br>(C/G)    | CC                           | 746 | 23.81(20.45-27.13)       | 0.54           | 0.93(0.86-0.98) | 0.86           | 4.34(3.73-5.11)            | 0.24           | 1.30(0.96-1.77)       | 0.17           | 1.06(0.89-1.28) | 0.47           |
|                                       | CG                           | 233 | 23.48(19.95-26.39)       |                | 0.93(0.88-0.98) |                | 4.53(3.87-5.04)            |                | 1.36(0.99-1.98)       |                | 1.04(0.86-1.26) |                |
|                                       | GG                           | 25  | 24.61(20.08-25.64)       |                | 0.93(0.85-1.01) |                | 3.85(3.43-4.99)            |                | 1.43(1.06-1.68)       |                | 1.06(0.86-1.23) |                |
| <i>KCNJ11</i><br>rs5219<br>(C/T)      | CC                           | 423 | 23.30(20.07-26.94)       | 0.02*          | 0.92(0.86-0.98) | 0.08           | 4.33(3.70-5.08)            | 0.67           | 1.28(0.95-1.78)       | 0.83           | 1.05(0.88-1.28) | 0.05           |
|                                       | CT                           | 456 | 23.88(20.42-26.72)       |                | 0.94(0.87-0.98) |                | 4.35(3.79-5.06)            |                | 1.34(0.99-1.82)       |                | 1.08(0.90-1.28) |                |
|                                       | TT                           | 127 | 24.24(21.26-27.56)       |                | 0.94(0.88-0.99) |                | 4.56(3.77-5.27)            |                | 1.39(0.98-1.91)       |                | 1.01(0.83-1.26) |                |
| <i>TCF7L2</i><br>rs7903146<br>(C/T)   | CC                           | 507 | 23.92(20.76-27.13)       | 0.21           | 0.93(0.87-0.99) | 0.12           | 4.38(3.77-5.10)            | 0.28           | 1.33(0.99-1.89)       | 0.95           | 1.07(0.87-1.29) | 0.31           |
|                                       | CT                           | 420 | 23.58(20.15-26.90)       |                | 0.93(0.87-0.98) |                | 4.31(3.70-5.06)            |                | 1.31(0.96-1.76)       |                | 1.04(0.88-1.27) |                |
|                                       | TT                           | 79  | 22.76(20.43-26.09)       |                | 0.91(0.85-0.96) |                | 4.51(3.92-5.23)            |                | 1.33(0.89-1.74)       |                | 1.08(0.96-1.26) |                |
| <i>SLC30A8</i><br>rs13266634<br>(C/T) | CC                           | 559 | 23.81(20.43-26.92)       | 0.88           | 0.93(0.86-0.98) | 0.42           | 4.35(3.74-5.14)            | 0.98           | 1.34(0.97-1.82)       | 0.45           | 1.05(0.87-1.26) | 0.45           |
|                                       | CT                           | 376 | 23.63(20.20-27.18)       |                | 0.92(0.87-0.98) |                | 4.38(3.78-5.06)            |                | 1.30(0.99-1.81)       |                | 1.07(0.88-1.28) |                |
|                                       | TT                           | 65  | 24.28(21.10-26.08)       |                | 0.94(0.88-0.98) |                | 4.31(3.70-5.03)            |                | 1.22(0.88-1.80)       |                | 1.04(0.90-1.40) |                |
| <i>HHEX</i><br>rs1111875<br>(A/G)     | AA                           | 336 | 23.92(21.02-26.98)       | 0.25           | 0.93(0.87-0.98) | 0.39           | 4.36(3.77-5.14)            | 0.69           | 1.36(0.98-1.91)       | 0.08           | 1.07(0.89-1.31) | 0.57           |
|                                       | AG                           | 487 | 23.73(20.08-27.21)       |                | 0.93(0.87-0.98) |                | 4.35(3.73-5.10)            |                | 1.29(0.96-1.76)       |                | 1.05(0.87-1.26) |                |
|                                       | GG                           | 180 | 23.81(20.20-26.31)       |                | 0.93(0.86-0.97) |                | 4.38(3.77-5.05)            |                | 1.33(0.99-1.88)       |                | 1.06(0.89-1.26) |                |
| <i>CDKN2A</i><br>rs10811661<br>(T/C)  | TT                           | 750 | 23.70(20.43-26.90)       | 0.92           | 0.93(0.87-0.98) | 0.04*          | 4.38(3.77-5.10)            | 0.71           | 1.30(0.98-1.80)       | 0.22           | 1.06(0.87-1.29) | 0.66           |
|                                       | TC                           | 242 | 23.93(20.20-27.03)       |                | 0.93(0.86-0.98) |                | 4.34(3.72-5.03)            |                | 1.39(0.94-1.93)       |                | 1.03(0.89-1.24) |                |
|                                       | CC                           | 14  | 23.49(21.71-27.99)       |                | 0.99(0.90-1.03) |                | 4.20(3.46-5.42)            |                | 1.24(0.91-1.63)       |                | 1.08(0.91-1.25) |                |
| <i>IGF2BP2</i><br>rs4402960<br>(G/T)  | GG                           | 329 | 23.87(20.32-27.34)       | 0.58           | 0.93(0.87-0.99) | 0.07           | 4.37(3.83-5.19)            | 0.84           | 1.37(0.98-1.92)       | 0.36           | 1.06(0.88-1.27) | 0.69           |
|                                       | GT                           | 507 | 23.80(20.32-26.48)       |                | 0.93(0.86-0.98) |                | 4.36(3.72-5.06)            |                | 1.32(0.97-1.78)       |                | 1.05(0.88-1.28) |                |
|                                       | TT                           | 170 | 23.52(20.60-27.72)       |                | 0.92(0.86-0.97) |                | 4.36(3.76-5.05)            |                | 1.24(0.97-1.72)       |                | 1.07(0.87-1.28) |                |
| <i>CDKALI</i><br>rs10946398<br>(A/C)  | AA                           | 631 | 23.68(20.32-26.81)       | 0.71           | 0.92(0.86-0.98) | 0.22           | 4.38(3.74-5.06)            | 0.56           | 1.29(0.96-1.78)       | 0.88           | 1.07(0.87-1.28) | 0.47           |
|                                       | AC                           | 299 | 23.85(20.81-26.93)       |                | 0.94(0.87-0.98) |                | 4.32(3.69-5.08)            |                | 1.36(0.98-1.82)       |                | 1.03(0.88-1.25) |                |
|                                       | CC                           | 59  | 22.18(18.93-28.13)       |                | 0.93(0.87-0.97) |                | 4.40(3.76-5.19)            |                | 1.34(0.98-1.79)       |                | 1.03(0.90-1.38) |                |

n represents the number of individuals. Data are presented as median (Interquartile range).

<sup>†</sup> Analysis adjusted for sex and age

<sup>‡</sup> Analysis adjusted for sex, age and BMI

\* Significant P-value

**Supplementary Table 7: Association of SNPs with quantitative traits (Glucose and Insulin metabolism) in Delhi study**

| Gene SNP                              | Genotypes Major Hetero Minor | n   | FPG (mmol/l)    |                | 2 h PG (mmol/l) |                | FPI (pmol/l)       |                | HOMA-IR         |                | HOMA-B              |                |
|---------------------------------------|------------------------------|-----|-----------------|----------------|-----------------|----------------|--------------------|----------------|-----------------|----------------|---------------------|----------------|
|                                       |                              |     | Median (IQR)    | P <sup>‡</sup> | Median (IQR)    | P <sup>‡</sup> | Median (IQR)       | P <sup>‡</sup> | Median (IQR)    | P <sup>‡</sup> | Median (IQR)        | P <sup>‡</sup> |
| <i>PPARG</i><br>rs1801282<br>(C/G)    | CC                           | 746 | 4.92(4.48-5.26) | 0.60           | 5.58(4.81-6.28) | 0.85           | 34.14(18.24-58.56) | 0.58           | 1.20(0.63-2.12) | 0.85           | 76.90(40.70-141.67) | 0.91           |
|                                       | CG                           | 233 | 4.88(4.55-5.29) |                | 5.43(4.86-6.44) |                | 29.34(15.90-46.20) |                | 1.08(0.56-1.69) |                | 64.86(41.43-121.66) |                |
|                                       | GG                           | 25  | 4.87(4.72-5.12) |                | 6.24(4.24-6.24) |                | 27.36(13.26-43.38) |                | 0.95(0.42-1.70) |                | 75.41(27.48-104.15) |                |
| <i>KCNJ11</i><br>rs5219<br>(C/T)      | CC                           | 423 | 4.87(4.46-5.24) | 0.43           | 5.57(4.90-6.21) | 0.04*          | 32.58(17.46-59.01) | 0.25           | 1.20(0.57-2.07) | 0.37           | 73.15(40.69-138.88) | 0.35           |
|                                       | CT                           | 456 | 4.94(4.52-5.27) |                | 5.35(4.56-6.26) |                | 31.23(17.42-52.80) |                | 1.10(0.61-1.92) |                | 69.19(40.67-132.69) |                |
|                                       | TT                           | 127 | 4.88(4.43-5.30) |                | 6.35(5.32-6.83) |                | 35.88(18.86-61.11) |                | 1.30(0.62-2.19) |                | 81.52(41.24-169.68) |                |
| <i>TCF7L2</i><br>rs7903146<br>(C/T)   | CC                           | 507 | 4.88(4.52-5.24) | 0.14           | 5.58(4.85-6.27) | 0.86           | 34.20(18.33-59.01) | 0.56           | 1.20(0.58-2.07) | 0.67           | 73.37(39.44-138.88) | 0.41           |
|                                       | CT                           | 420 | 4.97(4.48-5.28) |                | 5.46(4.62-6.35) |                | 30.72(17.04-54.00) |                | 1.11(0.59-1.99) |                | 72.68(41.48-134.74) |                |
|                                       | TT                           | 79  | 4.83(4.39-5.11) |                | 5.95(4.93-6.25) |                | 37.86(18.54-58.32) |                | 1.26(0.71-2.01) |                | 76.90(44.32-159.86) |                |
| <i>SLC30A8</i><br>rs13266634<br>(C/T) | CC                           | 559 | 4.91(4.51-5.26) | 0.76           | 5.33(4.66-6.35) | 0.59           | 33.33(17.94-58.85) | 0.61           | 1.21(0.63-2.06) | 0.71           | 74.66(40.52-141.06) | 0.95           |
|                                       | CT                           | 376 | 4.91(4.51-5.28) |                | 5.77(4.93-6.24) |                | 31.44(17.48-55.79) |                | 1.14(0.58-2.02) |                | 72.92(40.51-135.39) |                |
|                                       | TT                           | 65  | 4.89(4.52-5.17) |                | 5.94(4.91-6.26) |                | 30.78(17.94-47.88) |                | 1.05(0.55-1.82) |                | 75.41(44.32-127.95) |                |
| <i>HHEX</i><br>rs1111875<br>(A/G)     | AA                           | 336 | 4.88(4.56-5.28) | 0.46           | 5.43(4.74-6.16) | 0.20           | 32.94(17.46-58.56) | 0.62           | 1.23(0.59-2.02) | 0.68           | 79.24(41.94-139.07) | 0.77           |
|                                       | AG                           | 487 | 4.89(4.46-5.24) |                | 5.50(4.76-6.25) |                | 32.01(18.50-57.95) |                | 1.15(0.60-2.02) |                | 70.73(40.52-134.59) |                |
|                                       | GG                           | 180 | 4.98(4.50-5.24) |                | 5.95(5.14-6.61) |                | 32.46(16.62-54.00) |                | 1.17(0.57-1.95) |                | 75.41(38.55-132.99) |                |
| <i>CDKN2A</i><br>rs10811661<br>(T/C)  | TT                           | 750 | 4.95(4.56-5.28) | 0.002*         | 5.68(4.90-6.36) | 0.11           | 32.16(18.03-54.56) | 0.60           | 1.18(0.62-1.95) | 0.50           | 73.91(41.03-137.86) | 0.48           |
|                                       | TC                           | 242 | 4.84(4.37-5.19) |                | 5.31(4.52-6.14) |                | 32.40(17.10-63.24) |                | 1.13(0.55-2.15) |                | 76.71(40.52-141.67) |                |
|                                       | CC                           | 14  | 4.66(4.16-4.79) |                | 4.86(4.13-5.24) |                | 29.40(18.33-56.75) |                | 0.83(0.64-1.49) |                | 56.58(33.01-87.68)  |                |
| <i>IGF2BP2</i><br>rs4402960<br>(G/T)  | GG                           | 329 | 4.89(4.48-5.21) | 0.39           | 5.48(4.86-6.35) | 0.43           | 34.50(20.28-61.89) | 0.06           | 1.30(0.65-2.22) | 0.05           | 82.77(45.74-149.42) | 0.06           |
|                                       | GT                           | 507 | 4.88(4.47-5.28) |                | 5.58(4.82-6.16) |                | 30.36(15.75-54.81) |                | 1.06(0.56-1.86) |                | 65.77(35.97-130.77) |                |
|                                       | TT                           | 170 | 4.95(4.65-5.26) |                | 5.73(4.83-6.61) |                | 32.91(18.30-57.44) |                | 1.19(0.64-2.07) |                | 78.30(44.25-138.53) |                |
| <i>CDKALI</i><br>rs10946398<br>(A/C)  | AA                           | 631 | 4.86(4.44-5.26) | 0.17           | 5.67(4.87-6.30) | 0.76           | 31.89(16.79-56.43) | 0.59           | 1.14(0.57-1.96) | 0.35           | 71.27(40.51-138.62) | 0.75           |
|                                       | AC                           | 299 | 4.96(4.60-5.27) |                | 5.50(4.49-6.29) |                | 32.55(18.53-55.56) |                | 1.20(0.64-2.08) |                | 77.42(41.69-136.43) |                |
|                                       | CC                           | 59  | 4.92(4.61-5.17) |                | 5.81(4.93-6.32) |                | 32.67(19.37-63.93) |                | 1.16(0.65-2.52) |                | 75.96(45.98-126.78) |                |

n represents the number of individuals. Data are presented as median (Interquartile range).

† Analysis adjusted for sex and age

‡ Analysis adjusted for sex, age and BMI

\* Significant P-value

**Supplementary Table 8: Association of SNPs with quantitative traits (measures of obesity and lipid profile) in Pune study**

| Gene SNP                              | Genotypes Major Hetero Minor | n    | BMI (Kg/m <sup>2</sup> ) |                | WHR             |                | Total Cholesterol (mmol/l) |                | Triglyceride (mmol/l) |                | HDL-C (mmol/l)  |                |
|---------------------------------------|------------------------------|------|--------------------------|----------------|-----------------|----------------|----------------------------|----------------|-----------------------|----------------|-----------------|----------------|
|                                       |                              |      | Median (IQR)             | P <sup>†</sup> | Median (IQR)    | P <sup>†</sup> | Median (IQR)               | P <sup>‡</sup> | Median (IQR)          | P <sup>‡</sup> | Median (IQR)    | P <sup>‡</sup> |
| <i>PPARG</i><br>rs1801282<br>(C/G)    | CC                           | 1186 | 20.48(18.21-23.40)       | 0.86           | 0.84(0.76-0.91) | 0.92           | 3.77(3.28-4.36)            | 0.38           | 0.84(0.62-1.22)       | 0.08           | 1.03(0.87-1.26) | 0.94           |
|                                       | CG                           | 345  | 20.36(18.20-23.13)       |                | 0.83(0.76-0.92) |                | 3.77(3.27-4.23)            |                | 0.82(0.60-1.12)       |                | 1.05(0.87-1.23) |                |
|                                       | GG                           | 22   | 21.06(19.36-23.81)       |                | 0.85(0.81-0.89) |                | 3.69(3.34-4.06)            |                | 0.88(0.72-1.27)       |                | 1.03(0.83-1.31) |                |
| <i>KCNJ11</i><br>rs5219<br>(C/T)      | CC                           | 720  | 20.73(18.33-23.28)       | 0.09           | 0.84(0.76-0.91) | 0.49           | 3.74(3.28-4.33)            | 0.68           | 0.84(0.63-1.23)       | 0.91           | 1.03(0.85-1.23) | 0.08           |
|                                       | CT                           | 560  | 20.09(18.11-22.95)       |                | 0.85(0.78-0.91) |                | 3.77(3.26-4.31)            |                | 0.84(0.62-1.17)       |                | 1.03(0.87-1.23) |                |
|                                       | TT                           | 117  | 19.78(18.17-23.05)       |                | 0.82(0.76-0.91) |                | 3.76(3.30-4.24)            |                | 0.79(0.57-1.13)       |                | 1.08(0.92-1.32) |                |
| <i>TCF7L2</i><br>rs7903146<br>(C/T)   | CC                           | 942  | 20.23(18.14-23.08)       | 0.52           | 0.83(0.76-0.91) | 0.16           | 3.72(3.28-4.29)            | 0.44           | 0.83(0.61-1.17)       | 0.73           | 1.03(0.87-1.23) | 0.88           |
|                                       | CT                           | 499  | 20.50(18.51-23.55)       |                | 0.85(0.77-0.92) |                | 3.79(3.26-4.38)            |                | 0.87(0.63-1.25)       |                | 1.05(0.87-1.23) |                |
|                                       | TT                           | 74   | 20.04(19.16-23.46)       |                | 0.84(0.76-0.91) |                | 3.69(3.14-4.23)            |                | 0.82(0.61-1.18)       |                | 1.04(0.87-1.26) |                |
| <i>SLC30A8</i><br>rs13266634<br>(C/T) | CC                           | 928  | 20.34(18.17-23.19)       | 0.51           | 0.84(0.76-0.91) | 0.34           | 3.74(3.28-4.26)            | 0.30           | 0.83(0.61-1.21)       | 0.20           | 1.03(0.87-1.26) | 0.95           |
|                                       | CT                           | 535  | 20.50(18.30-23.45)       |                | 0.83(0.76-0.91) |                | 3.77(3.31-4.41)            |                | 0.85(0.62-1.18)       |                | 1.05(0.85-1.23) |                |
|                                       | TT                           | 76   | 20.53(19.18-22.90)       |                | 0.84(0.77-0.91) |                | 3.66(3.15-4.14)            |                | 0.80(0.61-1.16)       |                | 1.07(0.90-1.24) |                |
| <i>HHEX</i><br>rs1111875<br>(A/G)     | AA                           | 511  | 20.47(18.34-23.12)       | 0.64           | 0.83(0.76-0.91) | 0.47           | 3.74(3.31-4.36)            | 0.84           | 0.83(0.63-1.21)       | 0.48           | 1.05(0.88-1.26) | 0.06           |
|                                       | AG                           | 787  | 20.66(18.29-23.42)       |                | 0.84(0.77-0.91) |                | 3.77(3.26-4.31)            |                | 0.84(0.61-1.18)       |                | 1.03(0.85-1.21) |                |
|                                       | GG                           | 300  | 20.16(18.32-23.11)       |                | 0.85(0.76-0.91) |                | 3.74(3.28-4.30)            |                | 0.83(0.63-1.21)       |                | 1.03(0.82-1.23) |                |
| <i>CDKN2A</i><br>rs10811661<br>(T/C)  | TT                           | 804  | 19.76(17.96-22.29)       | 0.69           | 0.85(0.77-0.91) | 0.85           | 3.69(3.23-4.23)            | 0.18           | 0.80(0.61-1.11)       | 0.78           | 1.05(0.90-1.26) | 0.04*          |
|                                       | TC                           | 255  | 19.79(18.11-22.01)       |                | 0.85(0.77-0.92) |                | 3.67(3.23-4.23)            |                | 0.80(0.60-1.12)       |                | 1.05(0.90-1.23) |                |
|                                       | CC                           | 27   | 19.52(17.62-21.16)       |                | 0.81(0.78-0.90) |                | 3.38(3.04-3.81)            |                | 0.69(0.54-0.86)       |                | 1.00(0.81-1.13) |                |
| <i>IGF2BP2</i><br>rs4402960<br>(G/T)  | GG                           | 262  | 19.76(17.88-22.20)       | 0.76           | 0.86(0.77-0.92) | 0.79           | 3.64(3.21-4.23)            | 0.90           | 0.81(0.56-1.20)       | 0.12           | 1.03(0.90-1.23) | 0.15           |
|                                       | GT                           | 412  | 19.73(18.06-22.10)       |                | 0.85(0.77-0.92) |                | 3.67(3.23-4.18)            |                | 0.78(0.61-1.04)       |                | 1.08(0.90-1.29) |                |
|                                       | TT                           | 194  | 19.69(18.08-21.92)       |                | 0.85(0.76-0.92) |                | 3.65(3.20-4.26)            |                | 0.84(0.62-1.17)       |                | 1.05(0.85-1.26) |                |
| <i>CDKAL1</i><br>rs10946398<br>(A/C)  | AA                           | 835  | 20.48(18.30-23.13)       | 0.37           | 0.85(0.77-0.91) | 0.37           | 3.74(3.28-4.26)            | 0.21           | 0.84(0.63-1.21)       | 0.17           | 1.03(0.85-1.23) | 0.62           |
|                                       | AC                           | 576  | 20.36(18.29-23.18)       |                | 0.84(0.76-0.91) |                | 3.82(3.27-4.36)            |                | 0.83(0.60-1.18)       |                | 1.05(0.88-1.26) |                |
|                                       | CC                           | 101  | 20.25(18.08-23.26)       |                | 0.83(0.76-0.90) |                | 3.73(3.13-4.32)            |                | 0.89(0.63-1.22)       |                | 1.07(0.92-1.23) |                |

n represents the number of individuals. Data are presented as median (Interquartile range).

<sup>†</sup> Analysis adjusted for sex and age

<sup>‡</sup> Analysis adjusted for sex, age and BMI

\* Significant P-value

**Supplementary Table 9: Association of SNPs with quantitative traits (Glucose and Insulin metabolism) in Pune study**

| Gene SNP                              | Genotypes Major Hetero Minor | n    | FPG (mmol/l)    |                | 2 h PG (mmol/l) |                | FPI (pmol/l)       |                      | HOMA-IR         |                      | HOMA-B              |                |
|---------------------------------------|------------------------------|------|-----------------|----------------|-----------------|----------------|--------------------|----------------------|-----------------|----------------------|---------------------|----------------|
|                                       |                              |      | Median (IQR)    | P <sup>†</sup> | Median (IQR)    | P <sup>‡</sup> | Median (IQR)       | P <sup>‡</sup>       | Median (IQR)    | P <sup>‡</sup>       | Median (IQR)        | P <sup>‡</sup> |
| <i>PPARG</i><br>rs1801282<br>(C/G)    | CC                           | 1186 | 5.11(4.67-5.56) | 0.63           | 5.50(4.56-6.50) | 0.42           | 32.71(20.70-48.20) | 0.64                 | 1.22(0.76-1.87) | 0.51                 | 70.40(44.44-106.74) | 0.77           |
|                                       | CG                           | 345  | 5.06(4.67-5.50) |                | 5.61(4.72-6.39) |                | 31.00(20.84-48.24) |                      | 1.17(0.76-1.90) |                      | 67.62(45.03-116.27) |                |
|                                       | GG                           | 22   | 5.11(4.72-5.46) |                | 5.45(4.65-6.25) |                | 28.66(19.58-45.00) |                      | 1.10(0.74-1.58) |                      | 61.41(39.94-106.60) |                |
| <i>KCNJ11</i><br>rs5219<br>(C/T)      | CC                           | 720  | 5.11(4.61-5.50) | 0.004*         | 5.44(4.56-6.50) | 0.18           | 32.00(20.39-46.00) | 0.004*               | 1.17(0.74-1.77) | 0.001*               | 69.70(43.17-109.29) | 0.45           |
|                                       | CT                           | 560  | 5.22(4.83-5.61) |                | 5.50(4.61-6.56) |                | 33.27(22.05-51.18) |                      | 1.28(0.83-1.95) |                      | 67.67(46.32-101.12) |                |
|                                       | TT                           | 117  | 5.20(4.78-5.68) |                | 5.36(4.44-6.16) |                | 29.34(19.53-45.91) |                      | 1.14(0.72-1.68) |                      | 62.14(38.85-107.78) |                |
| <i>TCF7L2</i><br>rs7903146<br>(C/T)   | CC                           | 942  | 5.11(4.61-5.50) | 0.04*          | 5.28(4.50-6.31) | 0.04*          | 32.00(20.00-46.08) | 0.85                 | 1.17(0.72-1.81) | 0.83                 | 71.22(44.35-109.27) | 0.11           |
|                                       | CT                           | 499  | 5.17(4.72-5.56) |                | 5.67(4.72-6.56) |                | 32.00(21.14-51.13) |                      | 1.21(0.80-1.93) |                      | 67.19(42.92-111.20) |                |
|                                       | TT                           | 74   | 5.17(4.89-5.66) |                | 5.56(4.74-6.71) |                | 33.41(19.93-45.00) |                      | 1.23(0.72-1.78) |                      | 67.97(34.76-95.19)  |                |
| <i>SLC30A8</i><br>rs13266634<br>(C/T) | CC                           | 928  | 5.11(4.72-5.56) | 0.17           | 5.44(4.52-6.50) | 0.18           | 32.00(20.49-47.00) | 0.07                 | 1.19(0.76-1.86) | 0.03*                | 68.27(44.84-105.55) | 0.88           |
|                                       | CT                           | 535  | 5.11(4.61-5.50) |                | 5.61(4.72-6.50) |                | 32.92(20.53-49.24) |                      | 1.23(0.76-1.86) |                      | 68.50(43.01-112.40) |                |
|                                       | TT                           | 76   | 5.06(4.49-5.40) |                | 5.17(4.31-6.50) |                | 26.53(18.68-43.51) |                      | 0.99(0.68-1.72) |                      | 73.82(39.03-101.58) |                |
| <i>HHEX</i><br>rs1111875<br>(A/G)     | AA                           | 511  | 5.11(4.67-5.50) | 0.32           | 5.44(4.56-6.44) | 0.34           | 34.56(20.82-51.48) | 8×10 <sup>-4</sup> * | 1.26(0.78-2.02) | 3×10 <sup>-4</sup> * | 72.44(47.51-113.86) | 0.12           |
|                                       | AG                           | 787  | 5.11(4.67-5.50) |                | 5.44(4.56-6.56) |                | 31.02(21.00-45.26) |                      | 1.17(0.77-1.74) |                      | 68.32(44.12-106.72) |                |
|                                       | GG                           | 300  | 5.11(4.72-5.56) |                | 5.64(4.63-6.38) |                | 33.00(20.90-54.00) |                      | 1.28(0.76-2.02) |                      | 72.10(43.81-110.65) |                |
| <i>CDKN2A</i><br>rs10811661<br>(T/C)  | TT                           | 804  | 5.17(4.78-5.61) | 0.43           | 5.33(4.44-6.39) | 0.32           | 32.92(20.45-49.35) | 0.20                 | 1.23(0.76-1.93) | 0.17                 | 68.22(43.86-105.66) | 0.44           |
|                                       | TC                           | 255  | 5.22(4.83-5.50) |                | 5.50(4.56-6.44) |                | 29.51(20.44-45.95) |                      | 1.18(0.75-1.73) |                      | 61.80(42.63-95.67)  |                |
|                                       | CC                           | 27   | 5.28(4.94-5.70) |                | 5.22(4.36-6.42) |                | 32.71(25.18-56.99) |                      | 1.27(1.00-2.40) |                      | 71.97(43.57-106.66) |                |
| <i>IGF2BP2</i><br>rs4402960<br>(G/T)  | GG                           | 262  | 5.17(4.78-5.50) | 0.82           | 5.33(4.50-6.39) | 0.64           | 32.26(20.54-46.31) | 0.87                 | 1.20(0.78-1.81) | 0.92                 | 70.77(43.97-103.35) | 0.74           |
|                                       | GT                           | 412  | 5.17(4.78-5.61) |                | 5.33(4.44-6.31) |                | 30.74(20.44-47.97) |                      | 1.18(0.74-1.88) |                      | 64.86(43.88-100.46) |                |
|                                       | TT                           | 194  | 5.11(4.83-5.50) |                | 5.36(4.43-6.39) |                | 30.70(19.26-42.57) |                      | 1.13(0.71-1.68) |                      | 62.62(39.70-94.37)  |                |
| <i>CDKAL1</i><br>rs10946398<br>(A/C)  | AA                           | 835  | 5.11(4.72-5.56) | 0.62           | 5.50(4.61-6.50) | 0.09           | 32.29(20.35-49.49) | 0.18                 | 1.19(0.75-1.92) | 0.29                 | 67.97(41.57-107.72) | 0.06           |
|                                       | AC                           | 576  | 5.11(4.72-5.56) |                | 5.56(4.55-6.57) |                | 32.50(21.39-47.96) |                      | 1.23(0.79-1.87) |                      | 68.80(46.05-106.69) |                |
|                                       | CC                           | 101  | 5.14(4.61-5.50) |                | 4.94(4.39-6.00) |                | 35.87(23.10-53.20) |                      | 1.39(0.85-1.98) |                      | 78.56(53.20-119.62) |                |

n represents the number of individuals. Data are presented as median (Interquartile range).

† Analysis adjusted for sex and age

‡ Analysis adjusted for sex, age and BMI

\* Significant P-value
